# Supplementary material
Source: publisher site journal article supplement (https://www.dovepress.com/article/595530)
Supplement: Supplementary file 1 [file 595530%20Revised%20Supplementary%20Materials.docx]

**Supplementary Materials**

**Supplementary Table S1. Model diagnostic and internal validation results for the exploratory multivariable logistic regression models.**

| Model | Apparent AUC | HL χ² | df | *P* | Brier score | Optimism-  corrected AUC | Optimism-  corrected slope | VIF range |
| --- | --- | --- | --- | --- | --- | --- | --- | --- |
| SP-cFT model | 0.847 | 8.394 | 8 | 0.396 | 0.150 | 0.779 | 0.663 | 1.019–1.218 |
| δcFT model | 0.897 | 6.764 | 8 | 0.562 | 0.115 | 0.848 | 0.682 | 1.024–1.257 |

AUC, area under the receiver operating characteristic curve; df, degrees of freedom; HL, Hosmer–Lemeshow goodness-of-fit test; VIF, variance inflation factor.

Internal validation was performed using bootstrap resampling. Models were considered exploratory.

**
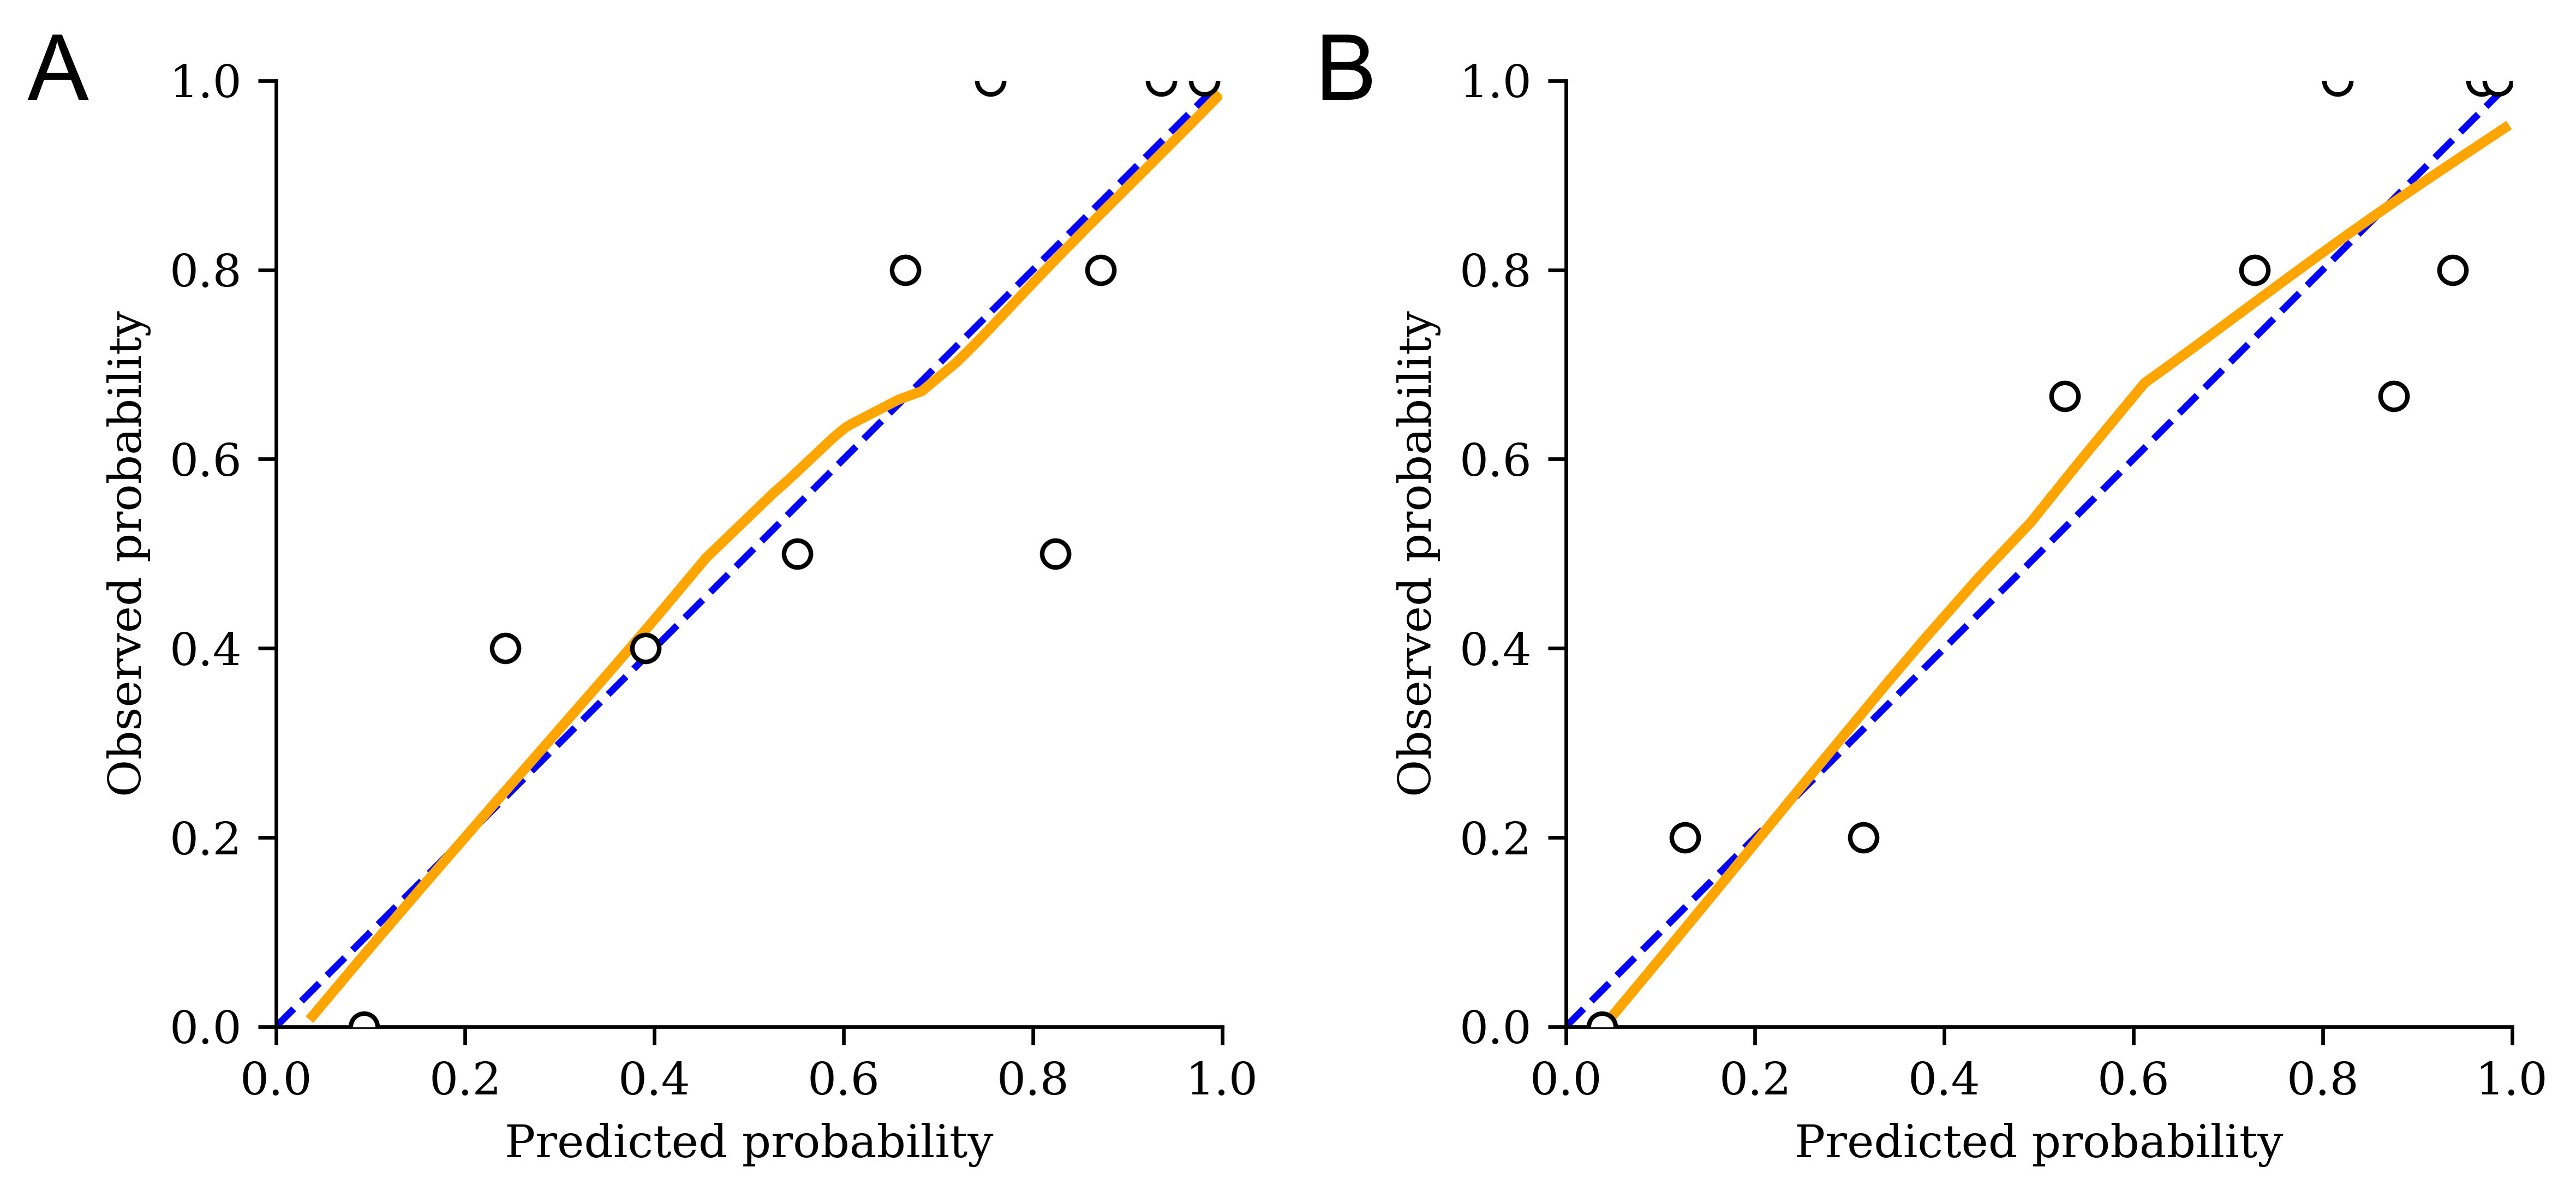
**

**Supplementary Figure S1. Calibration plots for the exploratory multivariable logistic regression models predicting spinal-anesthesia-induced hypotension (A, SP-cFT model; B, δcFT model).** The dashed diagonal line represents ideal calibration. The solid line represents the LOESS-smoothed relationship between predicted probabilities and observed event rates. Open circles indicate the observed proportions grouped by deciles of predicted risk.
